# Supplementary material
Source: MDPI journal article supplement (https://www.mdpi.com/2076-3298/8/6/57)
Supplement: s1 [file s1 › environments-1214543-SI.pdf]

### ***UniFG Community Mobility Survey***

This is an ANONYMOUS questionnaire to obtain information on the mobility habits of the UniFG community. The data collected will be used for scientific purposes and for international university rankings. No sensitive data will be disclosed to third parties or used for other purposes. You too can contribute to making UNIFG great.

Thanks for your help.

- 1) Gender:
  - ☐ M
  - ☐ F
- 2) Age:
  - ☐ 18 – 26
  - ☐ 27 – 35
  - ☐ 36 – 44
  - ☐ 45 – 53
  - ☐ 54 – 62
  - ☐ 63 and over
- 3) What is your role in the University of Foggia?
  - ☐ Bachelor student
  - ☐ Master student
  - ☐ Scientific technical staff
  - ☐ Administrative technical staff
- 4) What is your membership structure at the University of Foggia?
  - ☐ Department of Economics
  - ☐ Department of Economics, Management and Territory
  - ☐ Department of Law
  - ☐ Department of Agricultural, Food and Environmental Sciences
  - ☐ Department of Clinical and Experimental Medicine
  - ☐ Department of Medical and Surgical Sciences
  - ☐ Department of Humanities, Literature, Cultural Heritage, Education Sciences
  - ☐ Central Administration
  - ☐ Linguistic Center
  - ☐ Other
- 5) Starting from your usual home, how many km do you travel (ROUND TRIP) to reach your University of Foggia facility?  

---
- 6) How many minutes do you take (on average) to reach your facility within the University of Foggia?
  - ☐ From 1 to 10 minutes
  - ☐ From 11 to 20 minutes
  - ☐ From 21 to 40 minutes
  - ☐ From 41 to 60 minutes
  - ☐ From 61 to 120 minutes
  - ☐ Over 120 minutes

- 7) How many days a week (on average) do you go to the University in the months from APRIL to SEPTEMBER?

---

- 8) How many days a week (on average) do you go to the University in the months from OCTOBER to MARCH?

---

- 9) During the cold season (from OCTOBER to MARCH), how do you travel most of the distance to reach your facility at the University of Foggia?

- ☐ Bike
- ☐ Walk
- ☐ Car
- ☐ Motorcycle
- ☐ Bus
- ☐ Train
- ☐ Sharing Mobility
- ☐ Electric scooter
- ☐ Airplane
- ☐ Other (specify): \_\_\_\_\_

- 10) During the hot season (from APRIL to SEPTEMBER), how do you travel most of the distance to reach your facility at the University of Foggia?

- ☐ Bike
- ☐ Walk
- ☐ Car
- ☐ Motorcycle
- ☐ Bus
- ☐ Train
- ☐ Sharing Mobility
- ☐ Airplane
- ☐ Other (specify): \_\_\_\_\_

- 11) If you use a car to go to the university, what is it powered by?

- ☐ I go to the University by a means other than the car
- ☐ Car diesel, small (up to 1,200 c.c.)
- ☐ Car diesel, medium (from 1,200 to 2,000 c.c.)
- ☐ Car diesel, large (over 2,000 c.c.)
- ☐ Car petrol, small (up to 1,200 c.c.)
- ☐ Car petrol medium (from 1,200 to 2,000 c.c.)
- ☐ Car petrol, large (over 2,000 c.c.)
- ☐ Car methane
- ☐ Car LPG
- ☐ Car hybrid
- ☐ Car electric

- 12) If you use a car to go to the University, in which year was it registered?
- ☐ I go to the University by a means other than the car
  - ☐ Before 1993
  - ☐ 1993 - 1996
  - ☐ 1997 – 2000
  - ☐ 2001 – 2005
  - ☐ 2006 – 2010
  - ☐ 2011 – 2015 (August)
  - ☐ 2015 (September) – 2017 (August)
  - ☐ 2017 (September) – 2018 (August)
  - ☐ After 2018 (September)
- 13) If you use a car to go to the University, indicate the number of passengers including the driver:
- ☐ 1
  - ☐ 2
  - ☐ 3
  - ☐ 4
  - ☐ 5
  - ☐ 6
  - ☐ 7 and over
- 14) How many times do you move from your facility to other locations of the University of Foggia (other departments, libraries, CUS University, University Language Center)?
- ☐ Everyday
  - ☐ Three times a week
  - ☐ Twice a week
  - ☐ Once a week
  - ☐ Occasionally
  - ☐ Never
- 15) Which of the following sustainable mobility services would you like to use? (Multiple answers are allowed)
- ☐ Bicycle racks
  - ☐ Cycle paths
  - ☐ Car sharing with colleagues
  - ☐ More efficient public transport
  - ☐ Bus stops near departments
  - ☐ Bicycle rental
  - ☐ Electric scooter rental
  - ☐ Electric car rental
  - ☐ Other (specify): \_\_\_\_\_
- 16) Do you happen to have lunch when you are at the University?
- ☐ Never
  - ☐ Almost never
  - ☐ Times
  - ☐ Often
  - ☐ Always

- 17) In case you eat lunch when you are at the University, lunch is (typically):
- Brought from home
  - Consumed at the university cafeteria inside the University
  - Shops from outlets near the University
  - I never have lunch at the University
  - Other (specify): \_\_\_\_\_

**Figure S1.** The questionnaire submitted to the UniFG community.
